# Supplementary material for: Jak2 inhibitor – a jackpot for pharmaceutical industries: a comprehensive computational method in the discovery of new potent Jak2 inhibitors
Source: Royal Society of Chemistry journal article supplement (doi:10.1039/c4mb00071d), 2014-04-14

**Supplementary Table 1.** Summary of crystal structure used for the e-pharmacophore generation with their constituent co-crystal ligand with the number of hit molecule after screening against the zinc database.

| <b>Proteins</b> | <b>Ligands</b> | <b>Hypothesis</b> | <b>Selected compounds</b> |
|-----------------|----------------|-------------------|---------------------------|
| 2B7A            | IZA            | AADRRR            | 443                       |
| 2W1I            | L0I            | ADDRR             | 2000                      |
| 2XA4            | AZ5            | ADHR              | 1997                      |
| 3E63            | 5B2            | ADDRRR            | 734                       |
| 3E64            | 5B3            | ADDDRRR           | 246                       |
| 3FUP            | MI1            | AADRR             | 246                       |
| 3IOK            | 1P6            | ADRRRR            | 71                        |
| 3JY9            | JZH            | AADDDR            | 278                       |
| 3KCK            | 3KC            | AADRRRR           | 37                        |
| 3KRR            | DQX            | AARRRR            | 919                       |
| 3Q32            | J2I            | ADRR              | 3483                      |
| 3TJC            | 0TP            | ADDRRR            | 935                       |
| 3TJD            | 6TP            | ADDRRR            | 1567                      |
| 3E62            | 5B1            | ADDRR             | 2795                      |
| 3LPB            | NVB            | ADRRRR            | 561                       |

Supplementary Table 2. Summary of docking and MM/GBSA results for 27 lead molecules.

| <b>Compound ID</b> | <b>Docking score</b> | <b>MMGBSA <math>\Delta G_{\text{Bind}}</math> (kcal/mol)</b> | <b>MMGBSA <math>\Delta G_{\text{Bind}}</math> Coulomb (kcal/mol)</b> | <b>MMGBSA <math>\Delta G_{\text{Bind}}</math> Hbond (kcal/mol)</b> | <b>MMGBSA <math>\Delta G_{\text{Bind}}</math> Solv GB (kcal/mol)</b> | <b>MMGBSA <math>\Delta G_{\text{Bind}}</math> vdW (kcal/mol)</b> |
|--------------------|----------------------|--------------------------------------------------------------|----------------------------------------------------------------------|--------------------------------------------------------------------|----------------------------------------------------------------------|------------------------------------------------------------------|
| ZINC08764499       | -10.16               | -71.52                                                       | -3.70                                                                | -0.21                                                              | 28.89                                                                | -58.71                                                           |
| ZINC29078467       | -9.84                | -59.71                                                       | 83.77                                                                | -3.26                                                              | -61.08                                                               | -42.16                                                           |
| ZINC06624166       | -9.3                 | -64.8                                                        | -22.86                                                               | -1.59                                                              | 22.64                                                                | -43.27                                                           |
| ZINC79189191       | -8.79                | -61.86                                                       | -4.60                                                                | -0.39                                                              | 20.71                                                                | -47.51                                                           |
| ZINC12899088       | -8.73                | -79.00                                                       | -20.93                                                               | -0.9                                                               | 28.06                                                                | -50.97                                                           |
| ZINC00138875       | -8.68                | -62.55                                                       | -17.15                                                               | -0.68                                                              | 21.11                                                                | -35.11                                                           |
| ZINC02130359       | -8.38                | -59.95                                                       | 4.85                                                                 | -2.02                                                              | 18.32                                                                | -50.26                                                           |
| ZINC36369819       | -8.21                | -74.30                                                       | -13.43                                                               | -1.33                                                              | 25.59                                                                | -52.98                                                           |
| ZINC70666323       | -8.18                | -68.62                                                       | -7.34                                                                | -0.38                                                              | 16.98                                                                | -49.24                                                           |
| ZINC02160787       | -8.12                | -60.65                                                       | -4.29                                                                | -4.39                                                              | 16.76                                                                | -42.21                                                           |
| ZINC09215995       | -8.06                | -83.29                                                       | -20.49                                                               | -1.31                                                              | 22.30                                                                | -48.76                                                           |
| ZINC12901690       | -9.72                | -66.97                                                       | -3.68                                                                | -0.47                                                              | 24.02                                                                | -49.08                                                           |
| ZINC70666306       | -8.69                | -68.30                                                       | -25.52                                                               | -0.67                                                              | 32.25                                                                | -45.74                                                           |
| ZINC12296487       | -8.63                | -70.35                                                       | -16.55                                                               | -0.76                                                              | 29.50                                                                | -58.19                                                           |
| ZINC32124076       | -8.57                | -76.50                                                       | -18.68                                                               | -1.43                                                              | 31.56                                                                | -50.32                                                           |
| ZINC00391857       | -8.11                | -57.52                                                       | -11.73                                                               | -0.71                                                              | 25.31                                                                | -40.76                                                           |
| ZINC09130685       | -8.02                | -83.73                                                       | -16.32                                                               | -1.4                                                               | 26.56                                                                | -61.06                                                           |
| ZINC00517863       | -8.74                | -38.28                                                       | -18.64                                                               | -0.66                                                              | 22.88                                                                | -23.07                                                           |
| ZINC12892087       | -8.12                | -57.95                                                       | -20.84                                                               | -0.68                                                              | 29.28                                                                | -43.7                                                            |
| ZINC00138886       | -9.08                | -66.16                                                       | -19.23                                                               | -0.70                                                              | 25.41                                                                | -41.36                                                           |
| ZINC04000352       | -8.8                 | -72.23                                                       | -12.32                                                               | -0.60                                                              | 24.03                                                                | -55.86                                                           |
| ZINC00241869       | -8.74                | -68.76                                                       | -15.96                                                               | -0.70                                                              | 21.9                                                                 | -41.34                                                           |
| ZINC12898945       | -8.5                 | -67.46                                                       | -21.83                                                               | -2.66                                                              | 24.42                                                                | -37.39                                                           |
| ZINC12901845       | -8.41                | -71.26                                                       | -17.24                                                               | -0.97                                                              | 19.92                                                                | -46.77                                                           |
| ZINC70666656       | -8.29                | -78.94                                                       | -12.11                                                               | -0.91                                                              | 26.1                                                                 | -54.54                                                           |
| ZINC01293793       | -8.27                | -59.6                                                        | 6.72                                                                 | -0.96                                                              | 22.72                                                                | -49.95                                                           |
| ZINC08765154       | -8.2                 | -66.7                                                        | -5.83                                                                | -0.39                                                              | 16.48                                                                | -46.69                                                           |
| ZINC36369819       | -8.21                | -74.3                                                        | -13.43                                                               | -1.33                                                              | 25.59                                                                | -52.98                                                           |

**Supplementary Figure 1.** Alignment of two top score pharmacophore sites with the most active compound.

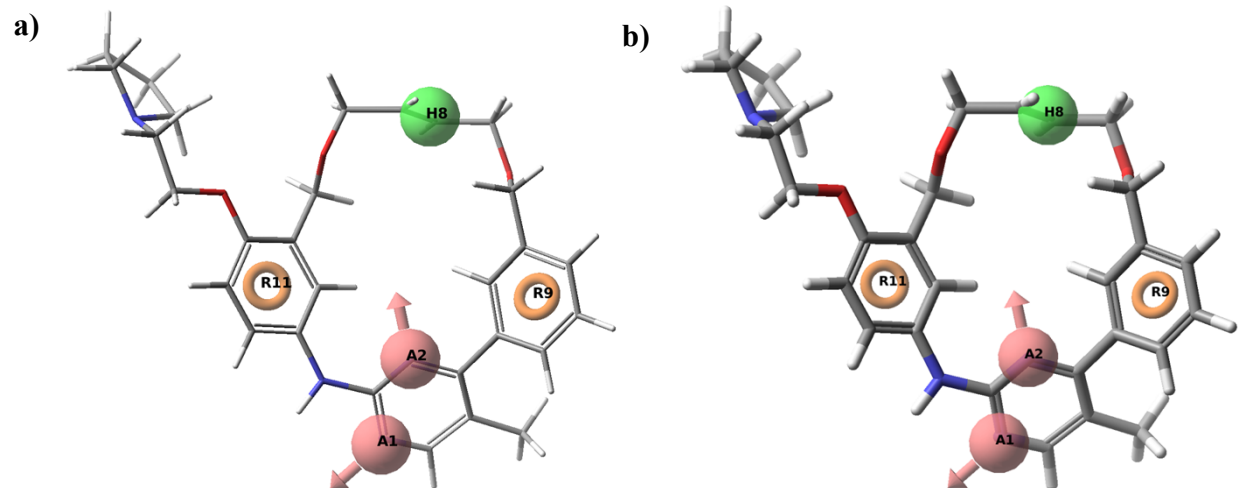

**Supplementary Figure 2.** E-Pharmacophore sites predicted from the 15 co-crystallized compounds of Jak2.

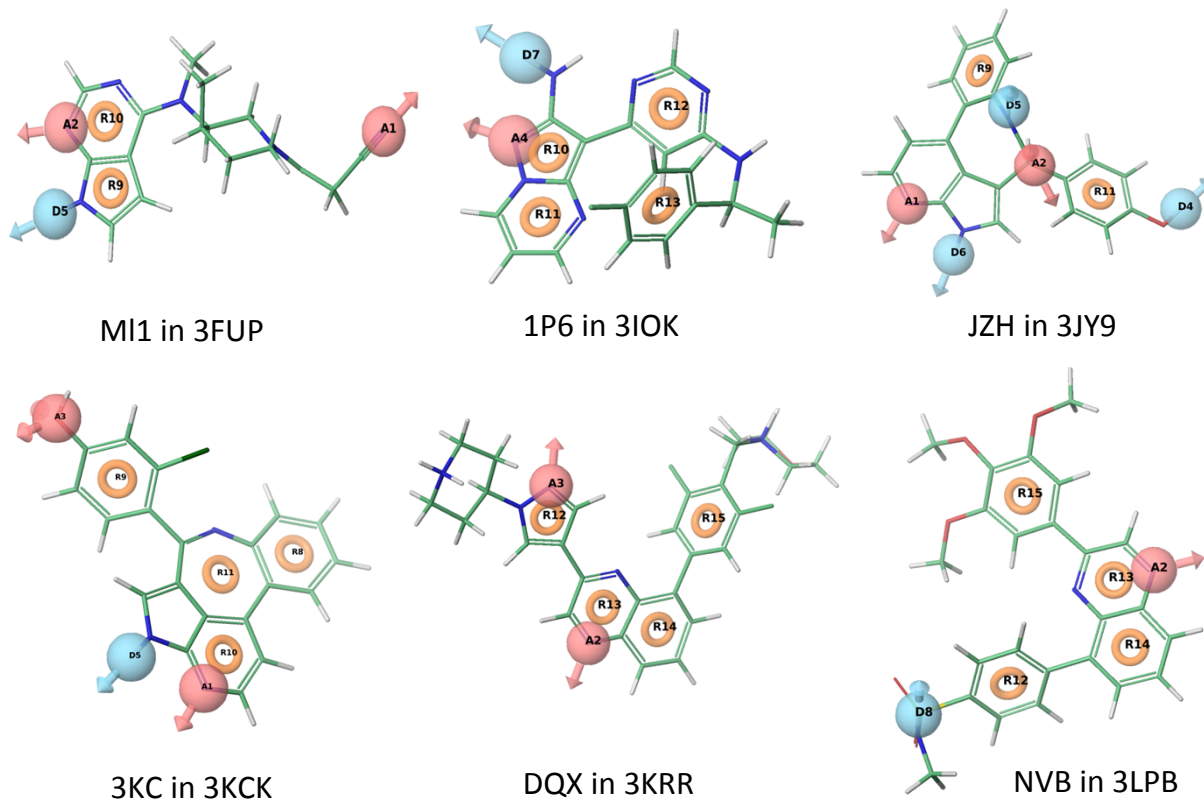

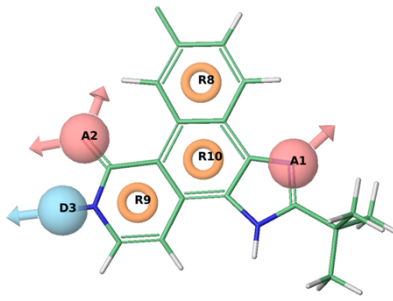

IZA in 2B7A

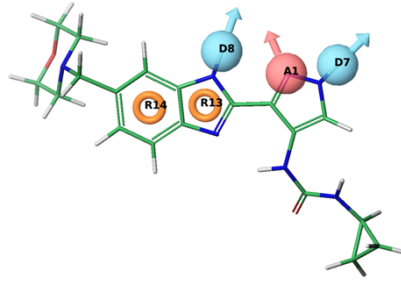

LOI in 2W1I

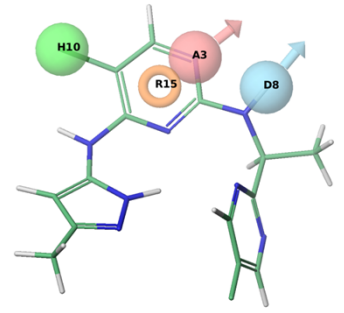

AZ5 in 2XA4

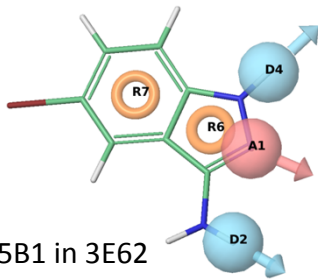

5B1 in 3E62

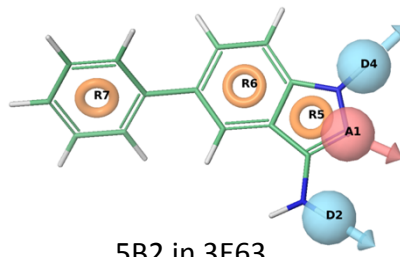

5B2 in 3E63

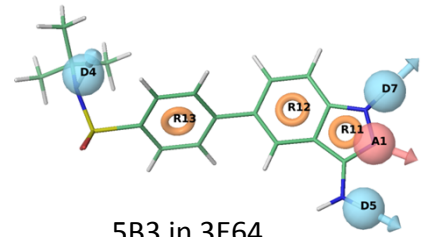

5B3 in 3E64

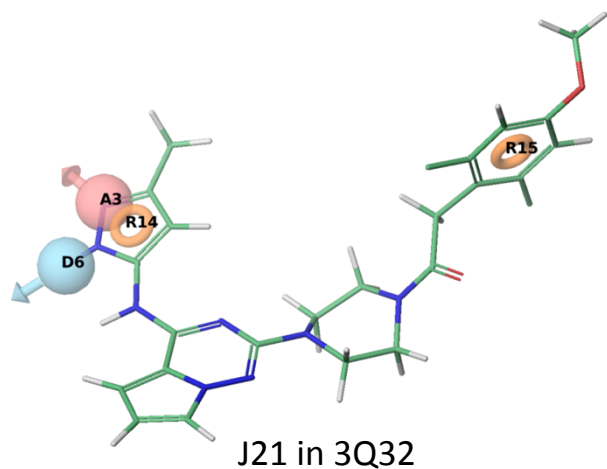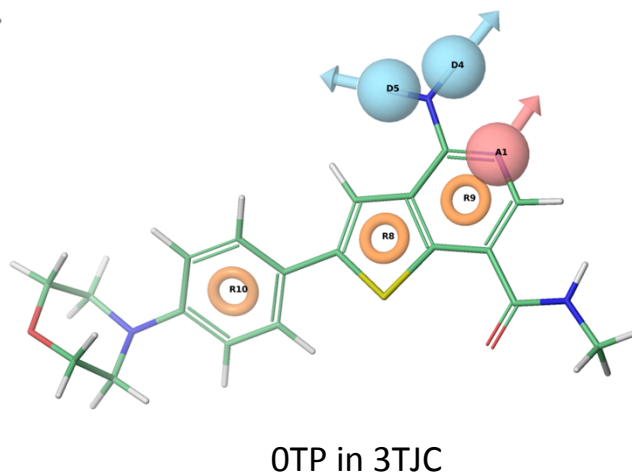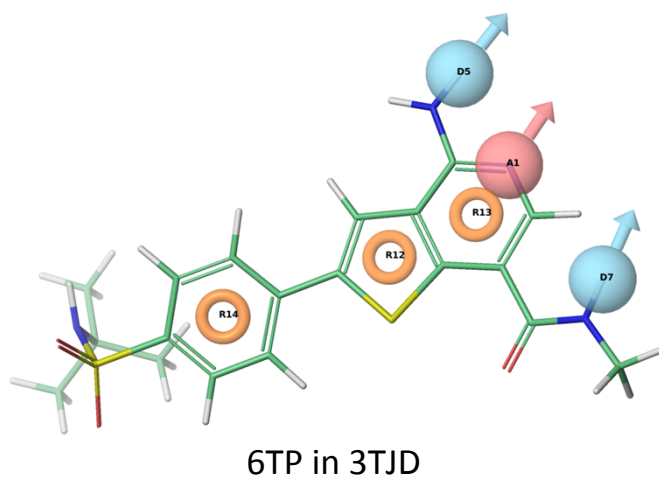

**Supplementary Figure 3.** Chemical structure of 27 hit compounds from Zinc database with their corresponding IDs.

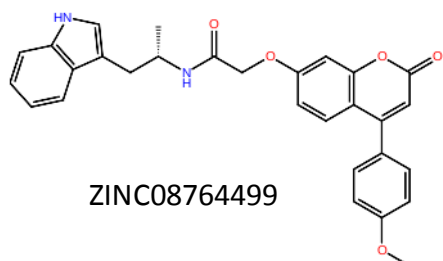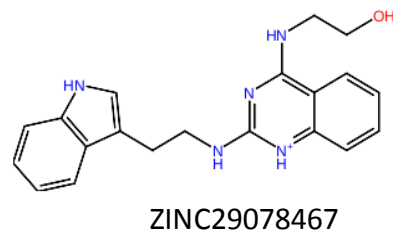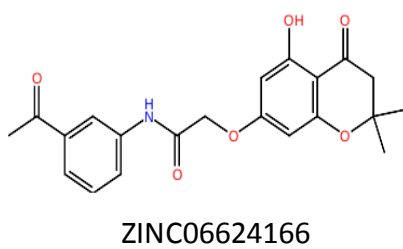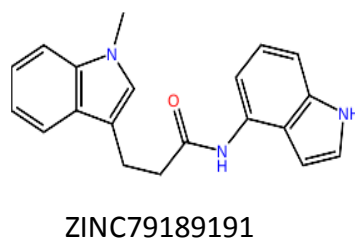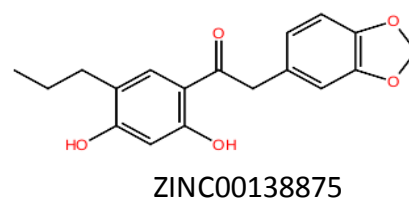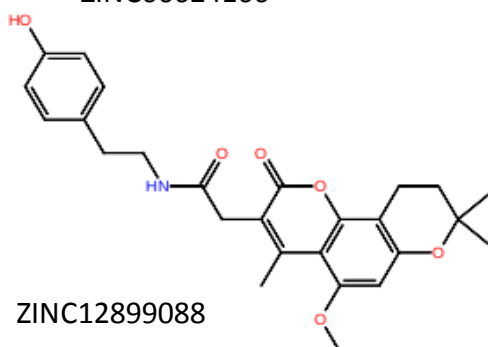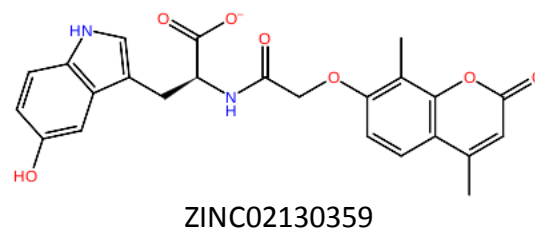

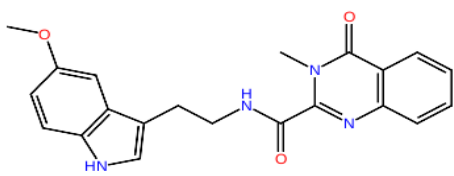

ZINC36369819

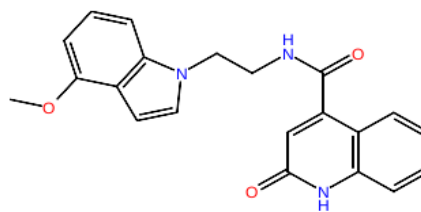

ZINC70666323

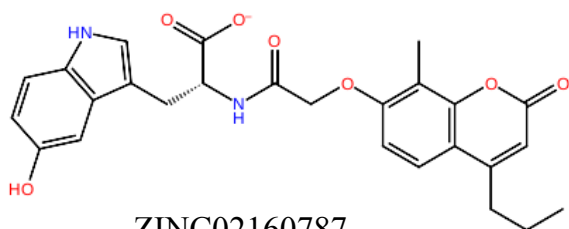

ZINC02160787

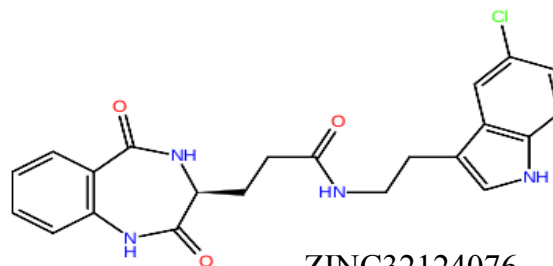

ZINC32124076

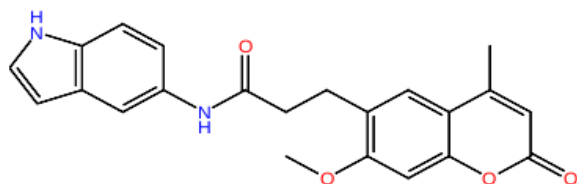

ZINC70666306

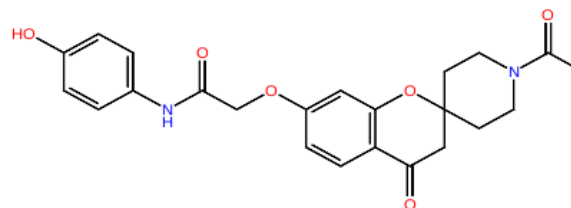

ZINC12296487



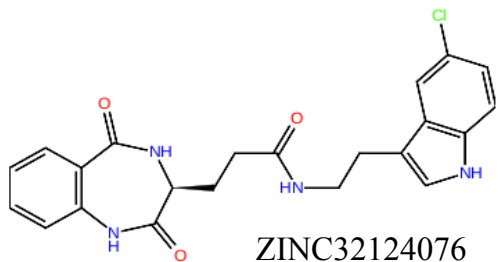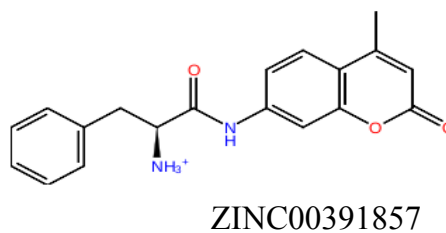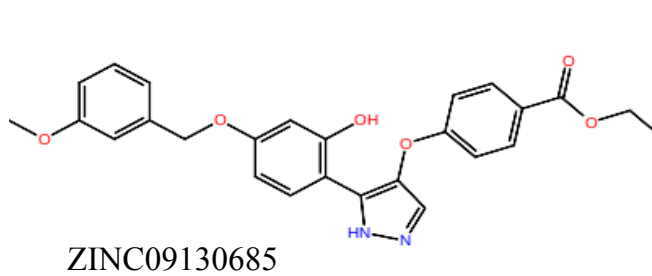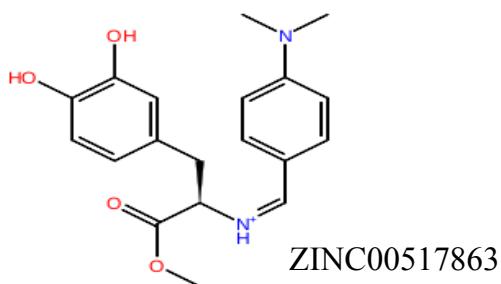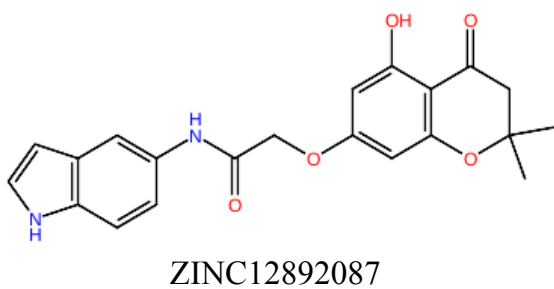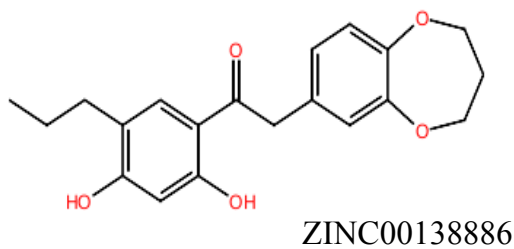

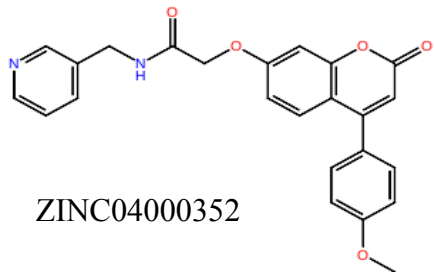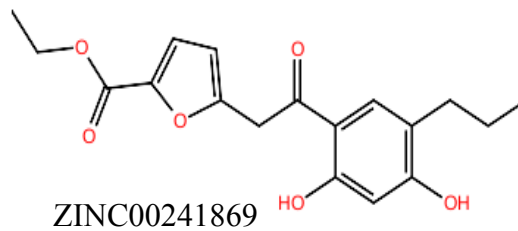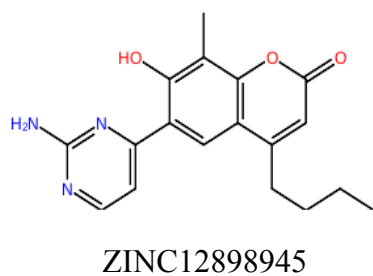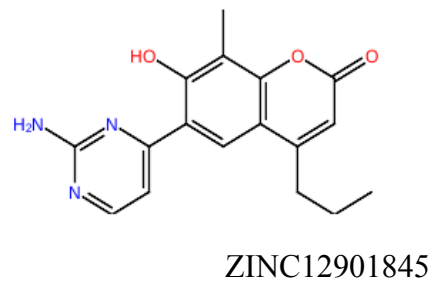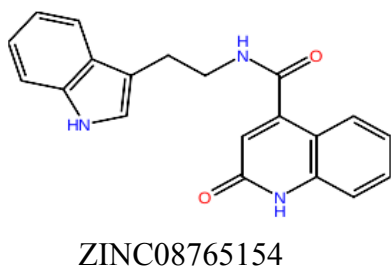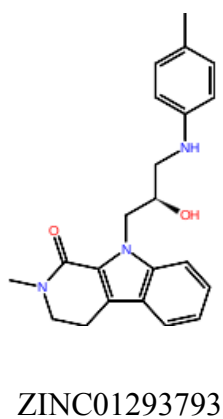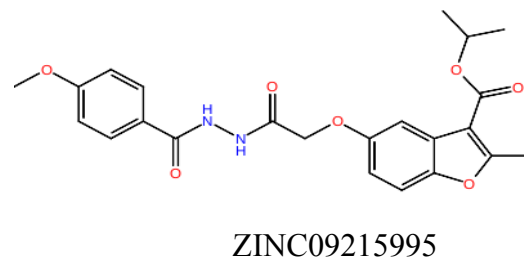

Supplement: c4mb00071d1.pdf [file c4mb00071d1.pdf]
